# Supplementary material for: Dermal IRF4+ dendritic cells and monocytes license CD4+ T helper cells to distinct cytokine profiles
Source: PubMed Central journal article supplement (PMC7647995; doi:10.1038/s41467-020-19463-9), 2020-11-06
Supplement: 41467_2020_19463_MOESM1_ESM.pdf [file 41467_2020_19463_MOESM1_ESM.pdf]

Dermal IRF4+ dendritic cells and monocytes prime CD4+ T helper cells to distinct  
cytokine profiles

Supplementary information

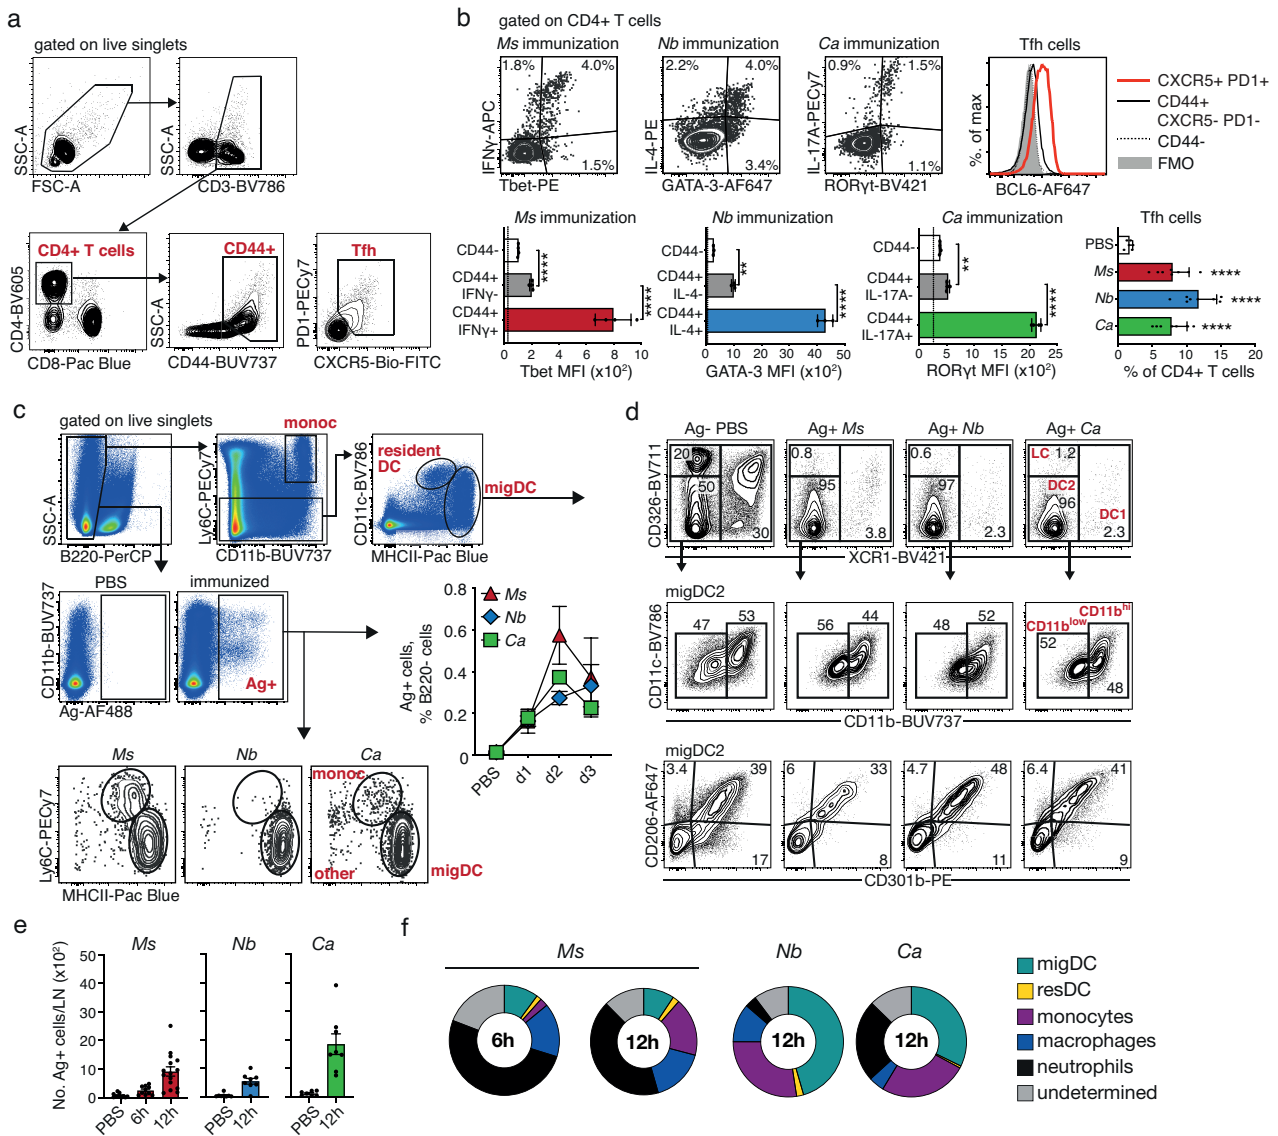

**Supplementary Fig. 1: Antigen (Ag) uptake and CD4+ T cell responses after immunization with *Ms*, *Nb* or *Ca*.**

Female C57BL/6 mice were immunized i.d. with *Ms*, *Nb*, *Ca*, or PBS as a control. Flow cytometry analysis was performed on lymph node (LN) cell suspensions at the indicated time points.

(a) Gating strategy for identifying CD4+ T cells in skin-draining LN. Gating is related to Fig. 3c-k, Fig. 4c-k, Fig. 5i, Supplementary Fig. 1b, Supplementary Fig. 4b-g, and Supplementary Fig. 5g-l.

(b) Cytokine and transcription factor (TF) expression in CD4+ T cells 5 days after immunization. LN cell suspensions were either re-stimulated with PMA/ionomycin and examined for cytokine and TF expression by intracellular flow cytometry or examined for expression of surface CXCR5 and PD1 and intracellular BCL6 without re-stimulation to identify follicular T helpers (Tfh). The dotted lines in the bar graphs refer to the median fluorescence intensity (MFI) of isotype staining controls. TF bar graphs show mean  $\pm$  SD for groups of  $n = 3$  (*Nb*) or 4 (*Ms* and *Ca*) mice from 1 of 2 independent experiments that gave similar results. The Tfh bar graphs show mean  $\pm$  SD for groups of  $n = 6$  (PBS), 7 (*Ca*) or 8 (*Ms* and *Nb*) mice over 2 independent experiments. Each dot corresponds to one mouse. Statistical significance was assessed using One-Way ANOVA with Holm-Sidak's post-test. \*\* $p < 0.01$ , \*\*\*\*  $p < 0.0001$ .

(c) Gating strategy for identifying Ag+ DC and monocytes. Gating is related to Fig. 1a-i, Fig. 2a-d, Fig. 3a-b, Fig. 4a-b, Fig. 5b, f, g, Supplementary Fig 1d-f, Supplementary Fig. 3a-c, Supplementary Fig. 4a, and Supplementary Fig 5a-b, d-f. Frequencies of Ag+ cells 1-3 days after immunization with AF488-labeled *Ms*, *Nb* or *Ca* are shown in the line graph. Symbols show mean  $\pm$  SEM for groups of  $n = 6$  (*Ms* d1, *Ms* d3, *Nb* d3,

*Ca* d3), 9 (*Nb* d1, *Ca* d1), 11 (*Ms* d2), 13 (*Nb* d2, *Ca* d2) or 14 (PBS) mice from 3 (*Ms*) or 4 (*Nb* and *Ca*) independent experiments.

(d) Gating strategy to assess the distribution of total and Ag+ cells in migratory DC (migDC) and migDC2 subsets in LN as in Fig. 1d and 1e, respectively. Contour plots show concatenated data from either 3 (PBS, two top panels) or 5 (lower PBS panel and all immunized groups) mice.

(e) Total numbers of Ag+ cells in LN at different times after immunization. Bar graphs show mean  $\pm$  SEM for groups of  $n = 8$  (PBS, *Nb* and *Ca*), 10 (*Ms* 6h) or 15 (*Ms* 12h) mice examined over 2 (*Ms* 6h, *Nb* and *Ca*) or 3 (*Ms* 12h) independent experiments.

(f) Cellular composition of Ag+ populations in LN at 6h or 12h after immunization. Data refer to  $n = 5$  mice/condition from 1 of 2 independent experiments that gave similar results. Source data are provided as a Source Data file.

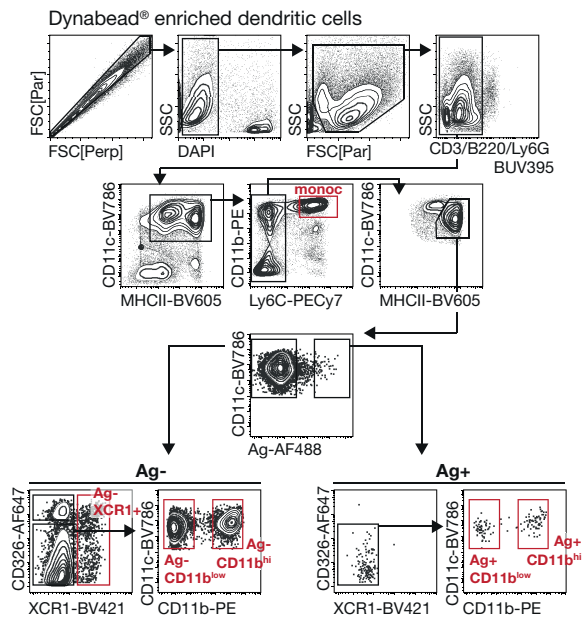

**Supplementary Fig. 2: Gating strategy for sorting Antigen (Ag)+ DC.**

Female C57BL/6 mice were immunized i.d. with *Ms*, *Nb*, *Ca*, or PBS as a control. Lymph node cell suspensions were prepared two days after immunization. Contour plots show the gating strategy used to sort Dynabead-enriched Ag+ and Ag- DC and total monocyte populations for the RT-qPCR analyses in Fig. 2e and Fig. 5a.

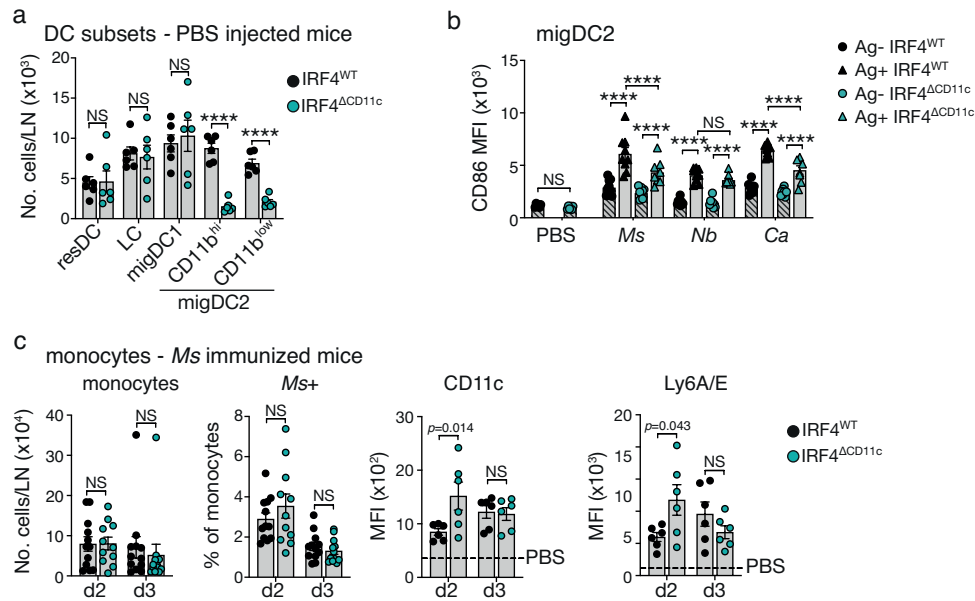

### Supplementary Fig. 3: Impact of conditional IRF4 deletion on DC and monocyte numbers and activation.

Mice were immunized i.d. with *Ms*, *Nb*, *Ca*, or PBS as a control. Lymph node (LN) cell suspensions were examined by flow cytometry at the indicated time points. Each symbol corresponds to one mouse.

(a) DC numbers in PBS-treated IRF4<sup>WT</sup>→ or IRF4<sup>ΔCD11c</sup>→ female C57BL/6 bone marrow chimeras.

(b) CD86 expression on Antigen (Ag)- and Ag+ migDC2 in IRF4<sup>WT</sup>→ or IRF4<sup>ΔCD11c</sup>→C57BL/6 bone marrow chimeras 2 days after immunization. Bar graphs show mean ± SEM for groups of  $n = 6$  (all PBS IRF4<sup>WT</sup> and IRF4<sup>ΔCD11c</sup>), 8 (*Ca* IRF4<sup>WT</sup>, all immunized IRF4<sup>ΔCD11c</sup>) or 9 (*Ms* IRF4<sup>WT</sup> and *Nb* IRF4<sup>WT</sup>) female chimeras over 2 independent experiments.

(c) Number of total monocytes, frequency of *Ms*+ monocytes and expression of CD11c and Ly6A/E in IRF4<sup>WT</sup> or IRF4<sup>ΔCD11c</sup> monocytes on day 2 or 3 after *Ms* immunization. Bar graphs show mean ± SEM for groups of  $n = 12$  (6 male + 6 female; number and frequency bar graphs) mice from 2 independent experiments, or  $n = 6$  (CD11c and Ly6A/E expression) female mice from 1 of 2 independent experiments that gave similar results.

Statistical analysis was by unpaired two-tailed Student's t-test (a) or Two-Way ANOVA with Sidak's post-test (b, c). NS: not significant; \*\*\*\*  $p < 0.0001$ . Exact p-values are shown for  $0.05 > p > 0.01$ . Source data are provided as a Source Data file.

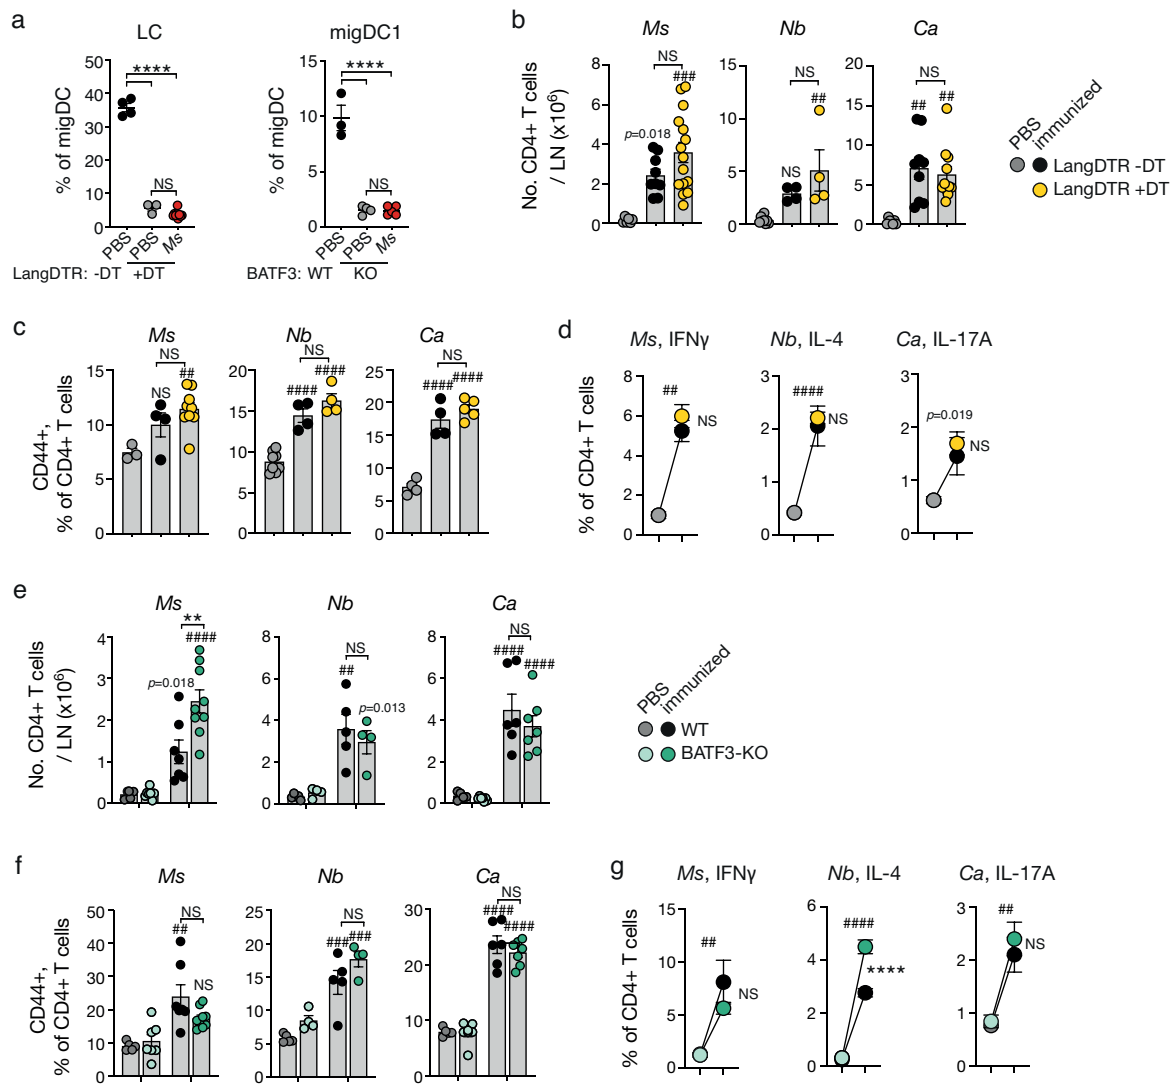

**Supplementary Fig. 4: Langerhans cells (LC) and migratory (mig)DC1 are not required for CD4+ T cell cytokine production after *Ms*, *Nb* or *Ca* immunization.**

LangDTR mice that were treated with diphtheria toxin (DT) or vehicle and BATF3-KO mice were immunized i.d. with *Ms*, *Nb*, *Ca*, or PBS as a control. CD4+ T cell responses were examined in lymph node (LN) cell suspensions by flow cytometry 5-7 days after immunization.

(a) Frequencies of LC in LangDTR mice, and migDC1 in BATF3-KO mice. Bar graphs show mean  $\pm$  SEM for groups of  $n = 4$  (LangDTR no DT PBS and BATF3-KO PBS), 3 (LangDTR+DT PBS and WT PBS), 9 (LangDTR+DT *Ms*) or 5 (BATF3-KO *Ms*) female mice from one of two independent experiments that gave similar results. Each symbol refers to one mouse.

(b-d) CD4+ T cell responses to *Ms*, *Nb* or *Ca* in LangDTR mice.

(b) Number of CD4+ T cells per LN across immunizations. Bar graphs show mean  $\pm$  SEM, group sizes are as in (d). Each symbol refers to one mouse.

(c) Frequencies of CD44+ cells in the CD4+ T cell population. Bar graphs show mean  $\pm$  SEM for groups of  $n = 3$ , 4 and 9 (PBS no DT, *Ms* no DT and *Ms* + DT, respectively); 8, 4 and 4 (PBS no DT, *Nb* no DT and *Nb* + DT, respectively), and 4, 4, and 5 (PBS no DT, *Ca* no DT and *Ca* + DT, respectively) female mice from one of two independent experiments that gave similar results. Each symbol refers to one mouse.

(d) Frequencies of cytokine+ CD4+ T cells in immunized mice. Graphs show mean  $\pm$  SEM for groups of  $n = 6$ , 9 and 15 (PBS no DT, *Ms* no DT and *Ms* + DT, respectively) and 7, 9, and 11 (PBS no DT, *Ca* no DT and *Ca* + DT,

respectively) female mice from two independent experiments, or  $n = 8, 4$  and  $4$  (PBS no DT, *Nb* no DT and *Nb* + DT, respectively) female mice from one of two independent experiments that gave similar results.

(e-g) CD4+ T cell responses to *Ms*, *Nb* or *Ca* in BATF3-KO and C57BL/6 control mice.

(e) Number of CD4+ T cells per LN across immunizations.

(f) Frequencies of CD44+ cells in the CD4+ T cell population.

(g) Frequencies of cytokine+ CD4+ T cells in immunized mice.

Graphs in (e-g) show mean  $\pm$  SEM for groups of  $n = 5, 7, 7$  and  $9$  (WT PBS and *Ms*; KO PBS and *Ms*, respectively) and  $5, 6, 7,$  and  $7$  (WT PBS and *Ca*; KO PBS and *Ca*, respectively) female mice from two independent experiments, or  $n = 5, 5, 4$  and  $4$  (WT PBS and *Nb*; KO PBS and *Nb*, respectively) female mice from one of two independent experiments that gave similar results. In (e), (f) each symbol refers to one mouse.

Statistical significance was assessed using One-Way ANOVA with Holm-Sidak's post-test (a-d) or Two-Way ANOVA with Sidak's post-test (e-g). NS: not significant; ##, \*\*  $p < 0.01$ ; ###  $p < 0.001$ ; ####, \*\*\*\*  $p < 0.0001$ . Hash symbols refer to comparisons between PBS and immunized mice of the same genotype. Asterisks refer to comparisons between similarly immunized mice of different genotypes. Exact p-values are shown for  $0.05 > p > 0.01$ . Source data are provided as a Source Data file.

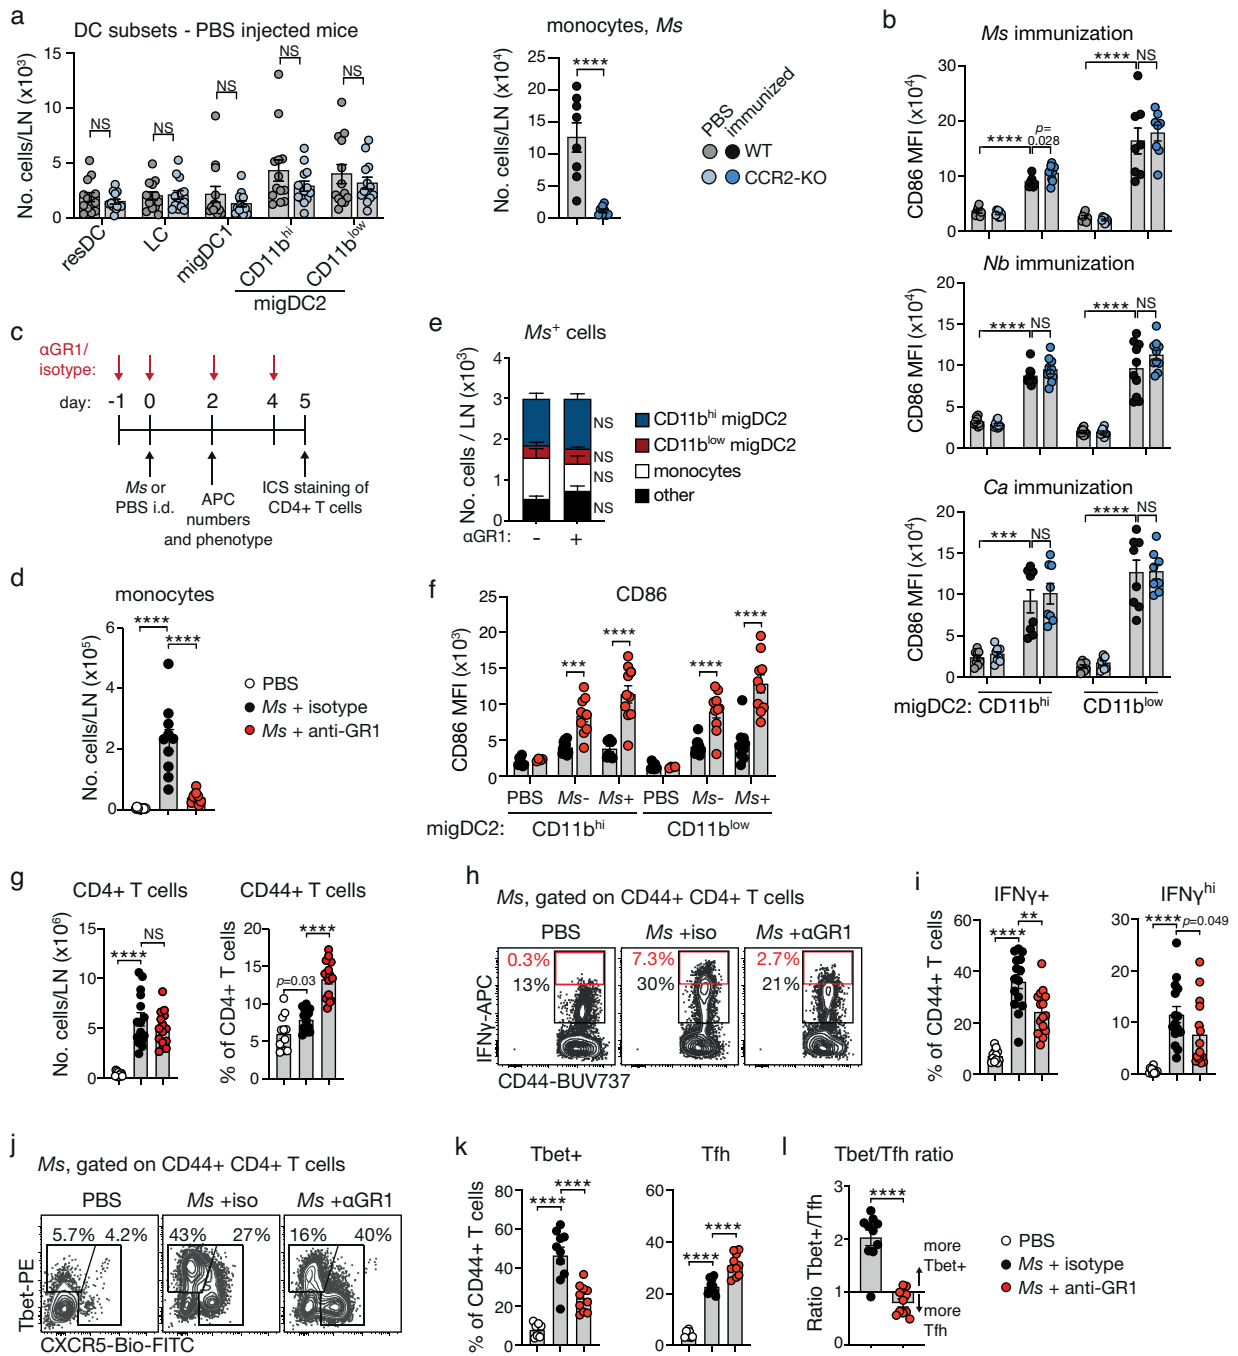

**Supplementary Fig. 5: Monocyte depletion differentially affects the development of Tbet<sup>+</sup> and T follicular helper (Tfh) CD4<sup>+</sup> T cells after *Ms* immunization.**

The role of monocytes in *Ms* immune responses was examined in CCR2-KO mice and C57BL/6 mice treated with anti-GR1. Mice were immunized i.d. with *Ms* or PBS as a control, and immune responses were measured in lymph node (LN) cell suspensions at the indicated times. Bar graphs show mean  $\pm$  SEM; symbols refer to individual mice (except (e)).

(a) DC numbers in PBS-injected CCR2-KO and WT mice. Monocyte numbers were determined two days after *Ms* immunization. Group sizes for the DC bar graphs are  $n = 13$  (4 female + 9 male) mice over 3 independent experiments. Group sizes for the monocyte bar graph are  $n = 8$  (4 female + 4 male) mice over 2 independent experiments.



- (b) CD86 expression on CD11b<sup>hi</sup> and CD11b<sup>low</sup> migDC2 from CCR2-KO and WT mice, two days after PBS, *Ms*, *Nb* or *Ca* injection. MFI: median fluorescence intensity. Group sizes are  $n = 8$  (4 female + 4 male, *Ms*), 10 male (*Nb*) and 8 male (*Ca*) mice, each examined over two independent experiments.
- (c) Experimental timeline of anti-GR1 treatments, immunizations and analyses for the experiments in (d-l).
- (d) Number of monocytes in the LN of aGR1-treated mice 2 days after *Ms* immunization. Group sizes are  $n = 12$  (PBS+isotype) or 10 (*Ms*) female mice over two independent experiments.
- (e) Cellular composition of Ag<sup>+</sup> populations from isotype and anti-GR1-treated mice. Group sizes are  $n = 10$  female mice over two independent experiments.
- (f) CD86 expression on Ag<sup>-</sup> and Ag<sup>+</sup> migDC2 subsets from isotype and anti-GR1-treated mice. Group sizes are  $n = 8$  (isotype PBS), 4 (anti-GR1 PBS) and 10 (all *Ms*- and *Ms*+) female mice examined over two independent experiments.
- (g-l) CD4<sup>+</sup> T cell responses to *Ms* in isotype and anti-GR1 treated mice were measured by intracellular cytokine staining following PMA/ionomycin re-stimulation, or by assessing the expression of Tbet and Tfh markers without re-stimulation.
- (g) Number of total CD4<sup>+</sup> T cells and frequency of CD44<sup>+</sup> cells in the CD4<sup>+</sup> T cell population. Group sizes are  $n = 12$  (PBS) and 15 (*Ms* ± aGR1) female mice examined over 3 independent experiments.
- (h) Contour plots showing IFN $\gamma$  expression in CD44<sup>+</sup> CD4<sup>+</sup> T cells. Data are concatenated from 5 mice/group; black and red gates highlight the IFN $\gamma$ <sup>+</sup> and IFN $\gamma$ <sup>hi</sup> populations respectively.
- (i) Frequencies of IFN $\gamma$ <sup>+</sup> and IFN $\gamma$ <sup>hi</sup> CD4<sup>+</sup> T cells in *Ms*-immunized mice. Group sizes are as in (g).
- (j) Contour plots showing Tbet and CXCR5 expression in CD44<sup>+</sup> CD4<sup>+</sup> T cells concatenated from 4 (PBS) or 5 (*Ms*-immunized) mice/group.
- (k) Frequencies of Tbet<sup>+</sup> CD4<sup>+</sup> T cells and CXCR5<sup>+</sup>PD1<sup>+</sup> Tfh cells in *Ms*-immunized mice. Group sizes are  $n = 7$  (PBS) and 10 (*Ms* ± aGR1) female mice examined over two independent experiments.
- (l) Ratio of Tbet<sup>+</sup> / Tfh cells in LN from isotype and anti-GR1-treated mice immunized with *Ms*. Group sizes are  $n = 10$  ratios from 10 female mice examined over two independent experiments.

Statistical significance was assessed using a Two-Way ANOVA with Sidak's post-test (DC in a, panels b and f), One-Way ANOVA with Holm-Sidak's post-test (d, g, i, k), and an unpaired two-sided Student's t-test (monocytes in a, panels e and l). NS: not significant, \*\* $p < 0.01$ , \*\*\* $p < 0.001$ , \*\*\*\* $p < 0.0001$ . Exact p-values are shown for  $0.05 > p > 0.01$ . Source data are provided as a Source Data file.

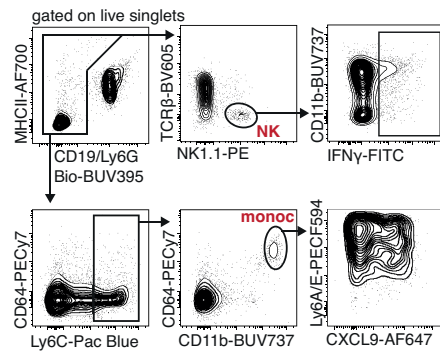

**Supplementary Fig. 6: Gating strategy for NK cells and monocytes in *Ms*-immunized mice**

Lymph node cell suspensions were prepared from *Ms*-immunized mice. Intracellular staining for IFN $\gamma$ + NK cells and CXCL9+ monocytes was after 5h incubation in brefeldin A and BD GolgiStop™ before fixation and permeabilization. Data refer to a C57BL/6 female mouse immunized with *Ms* 2 days previously. The gating shown refers to panels 5c, 5e (monocytes) and 5d, 5h (NK cells).
